# Supplementary material for: 当院NICUにおける敗血症発症率 : 最近10年間(1991-2000年)の頻度の変遷
Source: MDPI journal article supplement (doi:10.3390/biomedicines10040851), 2002-07-01
Supplement: s1 [file s1]

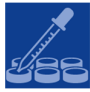

# Angiogenic T cells: potential biomarkers for the early diagnosis of interstitial lung disease in autoimmune diseases?

Verónica Pulito-Cueto<sup>1\*</sup>, Sara Remuzgo-Martínez<sup>1\*</sup>, Fernanda Genre<sup>1\*</sup>, Belén Atienza-Mateo<sup>1,2</sup>, Víctor M. Mora-Cuesta<sup>1,3</sup>, David Iturbe-Fernández<sup>1,3</sup>, Leticia Lera-Gómez<sup>1</sup>, Javier Rodríguez-Carrio<sup>4</sup>, Diana Prieto-Peña<sup>1,2</sup>, Virginia Portilla<sup>1,2</sup>, Ricardo Blanco<sup>1,2</sup>, Alfonso Corrales<sup>1,2</sup>, Oreste Gualillo<sup>5</sup>, José M. Cifrián<sup>1,3,6</sup>, Raquel López-Mejías<sup>1\*\*</sup> and Miguel A. González-Gay<sup>7,8\*\*</sup>

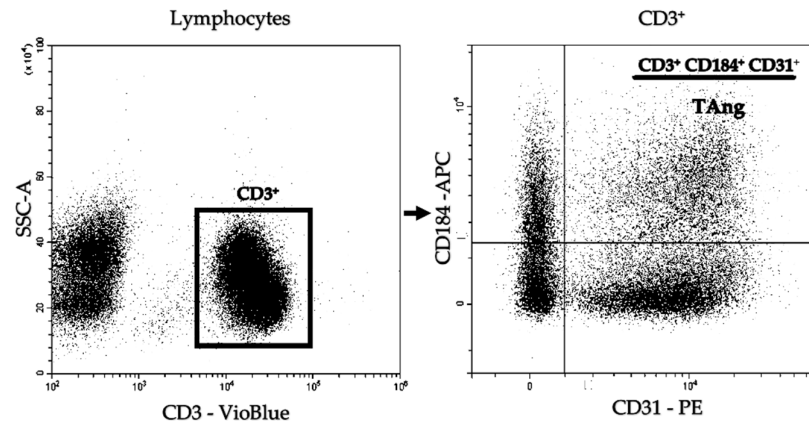

**Supplementary Figure S1. Representative dot-blots of the strategy used to quantify of TAng by flow cytometry.** CD3<sup>+</sup> were gated and then assayed for expression of CD184 and CD31 in the lymphocyte gate. TAng were considered as CD3<sup>+</sup>/CD184<sup>+</sup>/CD31<sup>+</sup> cells in the lymphocyte gate. Images obtained from Cytexpert 2.3 analyzer.



**Supplementary Table S1.** Clinical manifestations of patients with SSc-ILD<sup>+</sup> and SSc-ILD<sup>-</sup>.

|                                      | SSc-ILD <sup>+</sup><br>patients<br><i>n</i> = 21 | SSc-ILD <sup>-</sup><br>patients<br><i>n</i> = 20 |
|--------------------------------------|---------------------------------------------------|---------------------------------------------------|
| Pulmonary hypertension, <i>n</i> (%) | 3 (15.8)                                          | 0 (0.0)                                           |
| Renal impairment, <i>n</i> (%)       | 1 (4.8)                                           | 1 (5.0)                                           |
| Cardiac involvement, <i>n</i> (%)    | 6 (28.6)                                          | 1 (5.0)                                           |
| Raynaud's phenomenon, <i>n</i> (%)   | 21 (100.0)                                        | 20 (100.0)                                        |
| Esophageal dysfunction, <i>n</i> (%) | 12 (57.1)                                         | 5 (25.0)                                          |
| Calcinosis, <i>n</i> (%)             | 0 (0.0)                                           | 6 (30.0)                                          |
| Synovitis, <i>n</i> (%)              | 6 (28.6)                                          | 6 (30.0)                                          |

SSc: systemic sclerosis; ILD: interstitial lung disease.

**Supplementary Table S2.** Frequency of TAng (%) in all the individuals included in the study.

|                           |                           | <i>Mean ± SD</i> |
|---------------------------|---------------------------|------------------|
| Study Objective<br>Groups | AD-ILD <sup>+</sup>       | 11.560 ± 5.242   |
|                           | RA-ILD <sup>+</sup>       | 11.950 ± 5.234   |
|                           | SSc-ILD <sup>+</sup>      | 12.570 ± 5.052   |
|                           | Other AD-ILD <sup>+</sup> | 10.560 ± 6.684   |
| Comparative<br>Groups     | AD-ILD <sup>-</sup>       | 15.920 ± 4.612   |
|                           | RA-ILD <sup>-</sup>       | 16.400 ± 4.926   |
|                           | SSc-ILD <sup>-</sup>      | 16.070 ± 5.420   |
|                           | IPF                       | 11.340 ± 3.732   |
|                           | HC                        | 16.500 ± 4.830   |

TAng: angiogenic T cells; SD: standard deviation; AD: autoimmune disease; ILD: interstitial lung disease; RA: rheumatoid arthritis; SSc: systemic sclerosis; IPF: idiopathic pulmonary fibrosis; HC: healthy controls.



**Supplementary Table S3.** Detailed information of cellular and molecular endothelial dysfunction-related biomarkers in the whole cohort of patients with AD-ILD\*.

|                                                       |                 |
|-------------------------------------------------------|-----------------|
| <b>EPC Frequency (%)</b> ( <i>Mean ± SD</i> )         | 0.037 ± 0.017   |
| <b>EC Frequency (%)</b> ( <i>Mean ± SD</i> )          | 0.017 ± 0.019   |
| <b>VEGF mRNA expression</b> ( <i>Mean ± SD</i> )      | 0.040 ± 0.069   |
| <b>VEGF serum levels (pg/mL)</b> ( <i>Mean ± SD</i> ) | 89.620 ± 63.840 |

AD: autoimmune disease; ILD: interstitial lung disease; EPC: endothelial progenitor cells; SD: standard deviation; EC: endothelial cells; VEGF: vascular endothelial growth factor.
